# Supplementary material
Source: PubMed Central journal article supplement (PMC3787832)
Supplement: NIHMS515794-supplement-1_si_001.pdf [file NIHMS515794-supplement-1_si_001.pdf]

## Supporting Information

### Computational De Novo Design and Characterization of a Protein that Selectively Binds a Highly Hyperpolarizable Abiological Chromophore

H. Christopher Fry,<sup>‡</sup> Andreas Lehmann,<sup>‡¶</sup> Louise E. Sinks,<sup>‡</sup> Inge Asselberghs,<sup>‡</sup> Andrey Tronin,<sup>‡</sup> Venkata Krishnan,<sup>‡</sup> J. Kent Blasie,<sup>‡</sup> Koen Clays,<sup>‡</sup> William F. DeGrado,<sup>¶\*</sup> Jeffrey G. Saven,<sup>‡\*</sup> and Michael J. Therien<sup>§\*</sup>

<sup>‡</sup>*Department of Chemistry, University of Pennsylvania, Philadelphia, PA 19104-6323;*

<sup>‡</sup>*Department of Chemistry, University of Leuven, B-3001 Leuven, Belgium; <sup>¶</sup>Department of Pharmaceutical Chemistry, Investigator, Cardiovascular Research Institute, University of California at San Francisco, San Francisco, CA 94158-9001; <sup>§</sup>Department of Chemistry, Duke University, Durham, NC 27708-0354*

**Chart S1.** Sequence alignment between the monomeric single chain protein *PA<sub>SC</sub>* and *SCR<sub>PZ</sub>-1*. The highlighted regions represent segments of helical overlap that were used to guide the alignment.

**Figure S1.** Backbone alignment of models of *PA<sub>sc</sub>* (blue) and the template tertiary structure (red) of *SCR<sub>PZ</sub>-1* and *SCR<sub>PZ</sub>-2*.

**Figure S2.** Model structures illustrating acidic and basic residues of *SCR<sub>PZ</sub>-1* (top), *SCR<sub>PZ</sub>-2* (middle) and *PA<sub>SC</sub>* (Bottom) rendered in a spacefilling format from four different viewpoints. Lysine and arginine residues (blue) and aspartic and glutamic acid (red) and glutamine (purple) are highlighted to detail the differences between *SCR<sub>PZ</sub>-1* (Top) and *SCR<sub>PZ</sub>-2* (Bottom).

**Gene Sequences for *SCR<sub>PZ</sub> 1-3***

**Synthesis of [RuPZn](PF<sub>6</sub>)<sub>2</sub>**

**Scheme S1.** Synthesis of the *RuPZn* chromophore.

**Chart S1.** Sequence alignment between the monomeric single chain protein  $PA_{sc}$  and  $SCR\text{PZ-}I$ . The highlighted regions represent segments of helical overlap that were used to guide the alignment.

|          |    |            | N15---     | --N6       | N C       | C6---      | -----C15        |
|----------|----|------------|------------|------------|-----------|------------|-----------------|
| PA (SC)  | 1  | SPEEAMQEAQ | QTAREAEQAM | QKHR       | QAYDKG    | DQKAL      | OTAK EFQQAMQKHK |
| SCR $PZ$ | 1  | ELEKLR     | QTGEQILQIA | KQVN       | EIMLKG    | DDDSLEQLLK | LAYELIQQHT      |
|          |    |            |            | N15-----N6 | NC        | C6-----    |                 |
| PA (SC)  | 51 | QYMN---QA  | ISESVQKTAR | YFEQAMQKHR | QAYDKGDQK | AL         | OTAKEAQQ        |
| SCR $PZ$ | 47 | QLAYNRQEA  | DTE-IMKQGQ | QILEIAQQVN | EVLKGDKDS | LE         | QLIKLAYQ        |
|          |    |            |            |            |           |            | -C15            |
| PA (SC)  | 98 | AMQKHSQALR | G          |            |           |            |                 |
| SCR $PZ$ | 96 | LIQQLQELFE | KKN-----   | --         |           |            |                 |

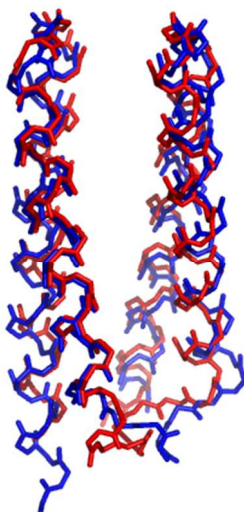

**Figure S1.** Backbone alignment of models of  $PA_{sc}$  (blue) and the template tertiary structure (red) of  $SCR\text{PZ-}1$  and  $SCR\text{PZ-}2$ .

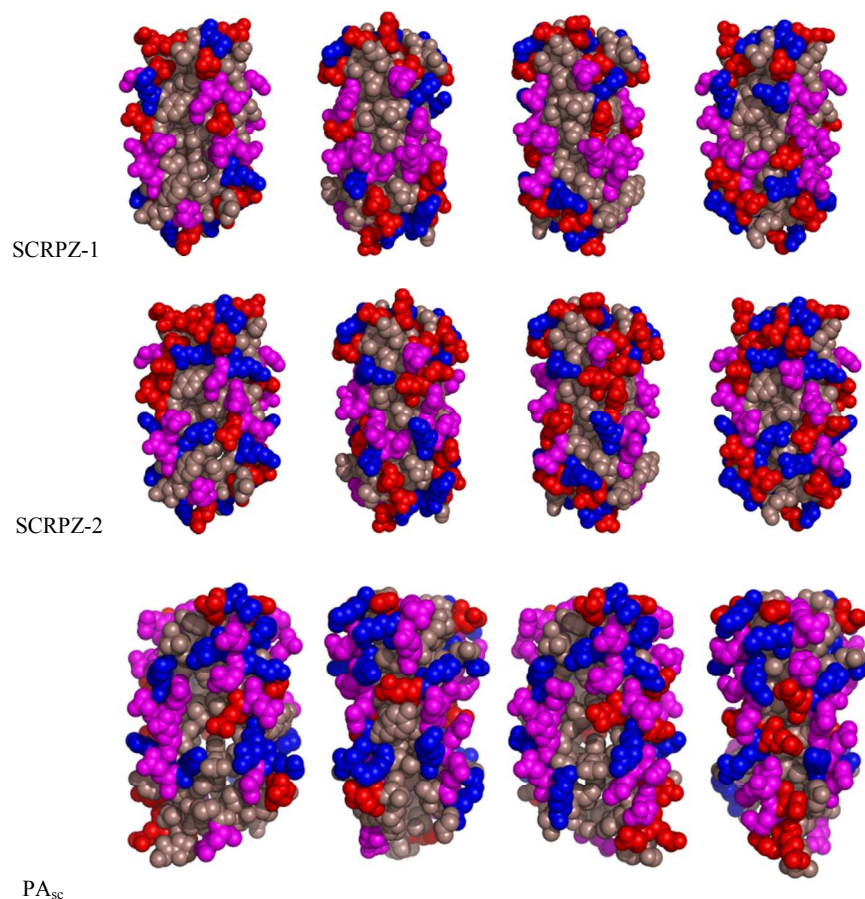

**Figure S2.** Model structures illustrating acidic and basic residues of *SCRYPZ-1* (top), *SCRYPZ-2* (middle) and  $PA_{sc}$  (Bottom) rendered in a spacefilling format from four different viewpoints. Lysine and arginine residues (blue) and aspartic and glutamic acid (red) and glutamine (purple) are highlighted to detail the differences between *SCRYPZ-1* (Top) and *SCRYPZ-2* (Bottom).

**Gene Sequences for *SCRPZ 1-3*.**

***SCRPZ-1:***

5' *CATATGGA*ACTGGAAAACTGCGTCAGACTGGTGAACAGATCCTGCAAATTGCGA  
AACAGGTTAACGAGATTATGCTGAAGGGTGATGACGACTCTCTGGAGCAGCTGATT  
AAACTGGCGTACGAACTGATCCAACAACACACCCAGCTGGCGTACAATCGTCAGGA  
AGCTGCGGATACGGAGATCATGAAACAGGGTCAGCAGATTCTGGAAATTGCCCAGC  
AGGTGAACGAAGTGCTGCTGAAAGGCGACAAAGACTCTCTGGAACAGCTGTAAAG  
CTGGCGTATCAGCTGATTCAGCAACTGCAGGAGCTGTTCGAAAAGAAAACTAAAA  
*GCTT* 3'

***SCRPZ-2:***

5' *CATATGGA*ACTGGAAAAGCTGCGTCAAACCTGGTGAACAGATCCTGCAAATTGCCCA  
GCGCGTGCCTGAGATTATGGACAAAGGTGACGACGATAGCCTGGAGCAACTGTTGG  
AGGAAGCCTATGAGCTGATCCAAAAGCACCGCCAACTGGCCTACAACCGTCAGGAG  
GCCGCGGACACCGAAATTATGAAACAAGGTGACCAGATTCTGCAAATCGCACAGCG  
TGTGCGCGAGGTTCTGGACAAGGGCGACAAGGACTCCCTGGAGCAGTTGATTGAGG  
AGGCGTACCAGCTGATTCAAAGTTGCGCGAGCTGTTCGAGAAAAGAACTAAGCTT  
3'

***SCRPZ-3:***

5' *CATATGGA*ACTGGAAAACTGCGTCAGACTGGTGAACAGATCCTGCAAATTGCGA  
AACAGGTTAACGAGATTATGCTGAAGGGTGATGACGACTCTCTGGAGCAGCTGATT  
AAACTGGCGTACGAACTGATCCAACAACACACCCAGCTGGCGTACAATCGTCAGGA  
AGCTGCGGATACGGAGATCATGAAACAGGGTCAGCAGATTCTGGAAATTGCCCAGC  
AGGTGAACGAAGTGCTGCTGAAAGGCGACAAAGACTCTCTGGAACAGCTGTTAAAG  
CTGGCGTATCAGCTGATTCAGCAACTGCAGGAGCTGTTCGAAAAGAAAACTAAAA  
*GCTT* 3'

## Synthesis of [RuPZn](PF<sub>6</sub>)<sub>2</sub>

The synthesis of the compound followed previous literature methods<sup>13</sup> but used the unsubstituted 5,15-diphenylporphyrin. For clarity, the reaction scheme is provided in the supporting information. <sup>1</sup>H-NMR (d<sub>6</sub>-DMSO, 500 MHz) 10.2 (s, 1), 10.01 (d, 2), 9.35 (d, 2), 9.30 (d, 2), 9.04 (d, 2), 8.89 (d, 2), 8.77 (d, 2), 8.73 (d, 2), 8.51 (d, 2), 8.45 (t, 1), 8.25 (d, 4), 7.97 (t, 2), 7.93 (t, 2), 7.85 (m, 6), 7.56 (d, 2), 7.41 (d, 2), 7.22 (t, 4). UV/Visible (THF): λ<sub>max</sub> = 428, 506, 637 nm MALDI-TOF MS: *m/z* = 1258.46 (M<sup>+</sup>, -PF<sub>6</sub>) (calculated *m/z* for C<sub>64</sub>H<sub>40</sub>F<sub>6</sub>N<sub>10</sub>PRuZn: 1259.14) and 1114.40 (M<sup>+</sup>, -2PF<sub>6</sub>) (calculated *m/z* for C<sub>64</sub>H<sub>40</sub>N<sub>10</sub>RuZn: 1114.18).

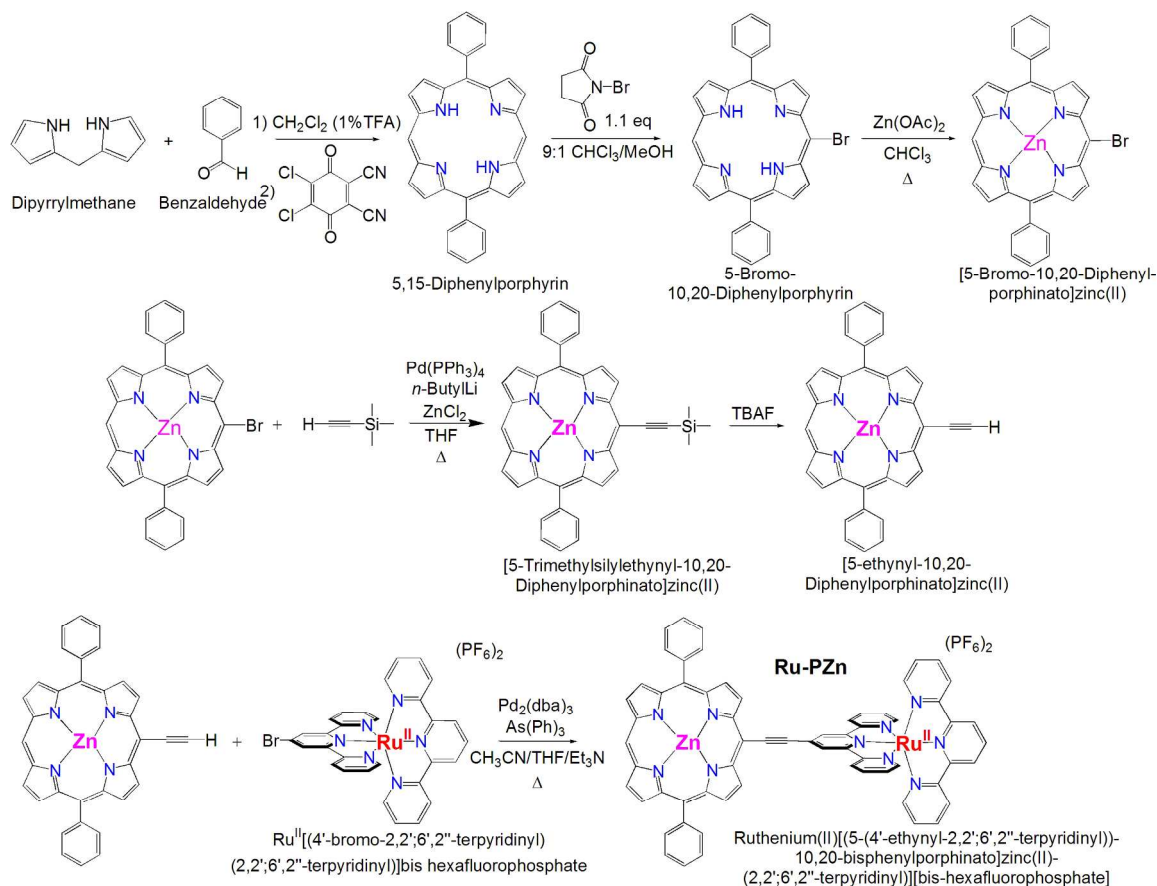

**Scheme S1.** Synthesis of the **RuPZn** chromophore.
